# Supplementary material for: Effects of the birthing room environment on vaginal births and client-centred outcomes for women at term planning a vaginal birth: BE-UP, a multicentre randomised controlled trial
Source: Springer Nature journal article supplement (doi:10.1186/s13063-018-2979-7), 2018-11-19
Supplement: MOESM2 [file 16279918]

|                                                                                                                                                                                                                | Enrolment                        | Allocation          |                                    |                               |                                 | Close-out                                  |
|----------------------------------------------------------------------------------------------------------------------------------------------------------------------------------------------------------------|----------------------------------|---------------------|------------------------------------|-------------------------------|---------------------------------|--------------------------------------------|
| TIMEPOINTS:                                                                                                                                                                                                    | $-t_1$<br>(before/ on admission) | 0<br>(on admission) | $t_1$<br>(during labour and birth) | $t_2$<br>(on post-natal unit) | $t_3$<br>(3 months post-partum) | $t_4$<br>(after conclusion of recruitment) |
| <b>ENROLMENT:</b>                                                                                                                                                                                              |                                  |                     |                                    |                               |                                 |                                            |
| Eligibility screen                                                                                                                                                                                             | X                                |                     |                                    |                               |                                 |                                            |
| Informed consent                                                                                                                                                                                               | X                                |                     |                                    |                               |                                 |                                            |
| Allocation                                                                                                                                                                                                     |                                  | X                   |                                    |                               |                                 |                                            |
| <b>INTERVENTIONS:</b>                                                                                                                                                                                          |                                  |                     |                                    |                               |                                 |                                            |
| <i>Redesigned birthing room (intervention)</i>                                                                                                                                                                 |                                  |                     | X                                  |                               |                                 |                                            |
| <i>Conventional birthing room (control)</i>                                                                                                                                                                    |                                  |                     | X                                  |                               |                                 |                                            |
| <b>ASSESSMENTS:</b>                                                                                                                                                                                            |                                  |                     |                                    |                               |                                 |                                            |
| <i>Inclusion &amp; exclusion criteria</i>                                                                                                                                                                      | X                                | X                   |                                    |                               |                                 |                                            |
| <i><u>Sociodemographic data:</u> health insurance, highest school education, single mother without partner support, migrant background</i>                                                                     |                                  | X                   |                                    |                               |                                 |                                            |
| <i><u>Prognostic factors:</u> age, BMI, gravidity, parity, induction of labour, previous CS; Additionally: week of gestation, premature rupture of membranes, and time of admission to OU.</i>                 |                                  | X                   |                                    |                               |                                 |                                            |
| <i><u>Primary outcome:</u> vaginal birth<br/><u>Secondary outcomes:</u> epidural analgesia, episiotomy, 3rd &amp; 4th degree perineal tears, blood loss &gt;1,000ml, "critical outcome of newborn at term"</i> |                                  |                     | X                                  |                               |                                 |                                            |

– continued on next page –

|                                                                                                                                                                                                                                                                                                                                                                                                                                                                                                                                                                                                                                                                                                                                                                                                                                                                                                                    | Enrolment                        | Allocation          |                                    |                               |                                 | Close-out                                  |
|--------------------------------------------------------------------------------------------------------------------------------------------------------------------------------------------------------------------------------------------------------------------------------------------------------------------------------------------------------------------------------------------------------------------------------------------------------------------------------------------------------------------------------------------------------------------------------------------------------------------------------------------------------------------------------------------------------------------------------------------------------------------------------------------------------------------------------------------------------------------------------------------------------------------|----------------------------------|---------------------|------------------------------------|-------------------------------|---------------------------------|--------------------------------------------|
| TIMEPOINTS:                                                                                                                                                                                                                                                                                                                                                                                                                                                                                                                                                                                                                                                                                                                                                                                                                                                                                                        | $-t_1$<br>(before/ on admission) | 0<br>(on admission) | $t_1$<br>(during labour and birth) | $t_2$<br>(on post-natal unit) | $t_3$<br>(3 months post-partum) | $t_4$<br>(after conclusion of recruitment) |
| <p><b><i>Other endpoints: artificial rupture of membranes, oxytocin labour augmentation, mode of fetal heart tracing, use of any analgesia, maternal body positions during labour and birth, use of the birthing bed; prolonged second stage (&gt; 30 min, &gt; 60 min), mode of birth, 1st and 2nd degree perineal tears, other genital tears, serious adverse events (e.g. shoulder dystocia, placental abruption, fetal acidosis, prolapsed chord, HELLP, etc.); newborn: time of birth, sex, birth weight.</i></b></p>                                                                                                                                                                                                                                                                                                                                                                                         |                                  |                     |                                    | X                             |                                 |                                            |
| <p><b><i>Maternal transfer to postnatal unit/ICU, joint discharge of mother and infant from postnatal unit, maternal death;</i></b><br/> <b><i>Participant-reported data:</i></b><br/> <b><i>expectations of birth, fear of birth (WDEQ-A), subjective experience of labour pain, of usefulness of equipment in birthing room, of positions and mobility, of staff and support persons, initiation and duration of breastfeeding</i></b></p>                                                                                                                                                                                                                                                                                                                                                                                                                                                                       |                                  |                     |                                    | X                             |                                 |                                            |
| <p><b><i>Participant-reported data:</i></b><br/> <b><i>Self-rated maternal health, physical/emotional wellbeing, expectations of birth, maternal self-determination (LAS), postnatal depression (EPDS)</i></b><br/> <b><i>adverse effects (e.g. pain associated with the perineum, sutures, urination and defecation, breastfeeding, etc.), stress due to infant regulation disorders (crying, nutrition, sleeping), early mother-child bonding (PBQ), transfer of newborn to other unit/hospital/ICU, documented health risks of infant, readmission to hospital,</i></b><br/> <b><i>out-of-hospital medical treatment of mother or newborn, pain medication or antibiotics for mother or newborn, domestic health/family care worker, medical aids, amount and duration of breastfeeding, cost of formula fed, willingness to pay for the alternative birthing room (intervention) in a future birth</i></b></p> |                                  |                     |                                    |                               | X                               |                                            |
| <p><b><i>Staff-reported data:</i></b><br/> <b><i>job satisfaction of midwives and obstetricians</i></b></p>                                                                                                                                                                                                                                                                                                                                                                                                                                                                                                                                                                                                                                                                                                                                                                                                        |                                  |                     |                                    |                               |                                 | X                                          |
